# Supplementary material for: Generalization Error Bound for an SGD Family via a Gaussian Approximation Method
Source: Research Square preprint supplement (doi:10.21203/rs.3.rs-3020104/v1), 2023-06-07

# Generalization Error Bound for an SGD Family via a Gaussian Approximation Method

Zhouwang Yang<sup>1\*</sup>, Hao Chen<sup>1</sup> and Zhanfeng Mo<sup>2</sup>

<sup>1\*</sup>University of Science and Technology of China, Hefei, 230026, China.

<sup>2</sup>Nanyang Technological University, 639798, Singapore.

\*Corresponding author(s). E-mail(s): [yangzw@ustc.edu.cn](mailto:yangzw@ustc.edu.cn);

Contributing authors: [ch330822@mail.ustc.edu.cn](mailto:ch330822@mail.ustc.edu.cn);

[ZHANFENG001@ntu.edu.sg](mailto:ZHANFENG001@ntu.edu.sg);

## Proof of Proposition 1

*Proof.* (1): Since  $\mathbf{u}_t$  is uniformly bounded,  $\exists \mathbf{C} \in \mathbb{R}^{p \times p}$ ,  $\mathbf{C} \succ 0$  such that  $\text{Cov}(\mathbf{u}_t) \prec \mathbf{C}$  holds for any  $t$ . Then we have

$$\begin{aligned}\text{Cov}(\boldsymbol{\theta}_\infty) &= \alpha^2 \sum_{t \geq 0} (\mathbf{I} - \alpha \mathbf{H}_S)^t \text{Cov}(\mathbf{u}_t) (\mathbf{I} - \alpha \mathbf{H}_S)^t \\ &\leq \alpha^2 \sum_{t \geq 0} \lambda_{\max}^{2t} (\mathbf{I} - \alpha \mathbf{H}_S) \mathbf{C} \\ &= \frac{\alpha^2}{1 - \lambda_{\max}^2 (\mathbf{I} - \alpha \mathbf{H}_S)} \mathbf{C} \\ &= \mathcal{O}(\alpha).\end{aligned}$$

(2): Let  $\phi_{\boldsymbol{\theta}_t}$  be the characteristic function of  $\boldsymbol{\theta}_t$ , thus

$$\begin{aligned}\phi_{\boldsymbol{\theta}_\infty}(\mathbf{s}) &= \prod_{t \geq 0} \phi_{\mathbf{u}_t}(\alpha (\mathbf{I} - \alpha \mathbf{H}_S)^t \mathbf{s}) \\ &= \prod_{t \geq 0} (1 - \alpha^2 \mathbf{s}^\top (\mathbf{I} - \alpha \mathbf{H}_S)^t \text{Cov}(\mathbf{u}_t) (\mathbf{I} - \alpha \mathbf{H}_S)^t \mathbf{s} + o(\alpha^2 \|\mathbf{s}\|_2^2)) \\ &= 1 - \mathbf{s}^\top \text{Cov}(\boldsymbol{\theta}_\infty) \mathbf{s} + o(\|\mathbf{s}\|_2^2 \alpha^2),\end{aligned}$$

By the proof of (1),  $\phi_{\theta_\infty}(\mathbf{s}) \rightarrow 1 - \mathbf{s}^\top \text{Cov}(\theta_\infty) \mathbf{s}$  as  $\alpha \rightarrow 0$ , thus  $\alpha^{-1/2}(P(\alpha) - \hat{P}(\alpha)) \xrightarrow{\text{law}} \mathbf{0}$ .  
(3): Let event  $A = \{\theta \mid \|\theta[i] - \theta_S^*[i]\| \leq K\sqrt{\Sigma[i][i]}, i = 1, \dots, p\}$ .

$$\mathcal{W}^{(1)}(P|_{\Theta_K}, \hat{P}|_{\Theta_K}) = \inf_{F_{\theta_1}=F_P|_{\Theta_K}, F_{\theta_2}=F_{\hat{P}}|_{\Theta_K}} \mathbb{E}_{\theta_1, \theta_2} \|\theta_1 - \theta_2\|_1 \quad (1)$$

$$\leq \inf_{F_{\theta_1}=F_P, F_{\theta_2}=F_{\hat{P}}} \mathbb{E}_{\theta_1, \theta_2} [\|\theta_1 - \theta_2\|_1 \cdot \chi_A(\theta_1) \cdot \chi_A(\theta_2)] \quad (2)$$

$$\leq \inf_{F_{\theta_1}=F_P, F_{\theta_2}=F_{\hat{P}}} \sum_{i=1}^p \int_{\theta_S^*[i]-K\sqrt{\Sigma[i][i]}}^{\theta_S^*[i]+K\sqrt{\Sigma[i][i]}} |F_{P_i}(x) - F_{\hat{P}_i}(x)| dx \quad (3)$$

$$\leq 2K \sum_{i=1}^p \sqrt{\Sigma[i][i]} \cdot C \mathbb{E} |\theta[i] / \sqrt{\Sigma[i][i]}|^3 \quad (4)$$

$$\leq 2\tilde{C}K \sum_{i=1}^p (\Sigma[i][i])^{-1} \cdot \left( \sum_{t \geq 0} \alpha^3 (1 - \alpha \lambda_{\min}(\mathbf{H}_S))^{3t} \Gamma \right) [i] \quad (5)$$

$$\leq \frac{2\alpha^2 \tilde{C} K \Gamma}{3\lambda_{\min}(\mathbf{H}_S)} \text{tr}(\Sigma^{-1}), \quad (6)$$

where  $F_{P_i}$  is the cumulative function of  $\theta[i]$ , (4) is obtained by Berry-Essen inequality.  $\square$

## Proof of Lemma 2

*Proof.* Let's start with a claim: Suppose the parameter space  $\Theta$  is compact, for  $\forall \delta \in (0, 1)$ , with probability of at least  $1 - \delta$  over the choice of  $S$ , there exists a constant  $C(\delta, \Theta)$  such that  $\|L_S - L\|_{\text{lip}} \leq C(\delta, \Theta)/\sqrt{n}$ .

Proof of claim: By CLT, as  $n \rightarrow \infty$ ,

$$\left( \frac{1}{\sqrt{n}} \sum_{i=1}^n \nabla_{\theta} l(f_{\theta}(x_i), y) - \nabla_{\theta} L(\theta) \right) \xrightarrow{d} \mathcal{N}(0, \text{Cov}(\nabla_{\theta} l(f_{\theta}(x), y))).$$

Hence, by standard Chebyshev inequality, for  $\forall \delta \in (0, 1)$ , with probability of at least  $1 - \delta$  over the choice of  $S$ , we have

$$\sup_{\theta \in \Theta} \left\| \frac{1}{\sqrt{n}} \sum_{i=1}^n \nabla_{\theta} l(f_{\theta}(x_i), y) - \nabla_{\theta} L(\theta) \right\|^2 \leq \sup_{\theta \in \Theta} \text{tr}(\text{Cov}(\nabla_{\theta} l(f_{\theta}(x), y))) / (\delta n),$$

where  $\Theta$  is the compact parameter space. Then, the proof is completed by taking

$$C(\delta, \Theta) = 2 \sqrt{\sup_{\theta \in \Theta} \text{tr}(\text{Cov}(\nabla_{\theta} l(f_{\theta}(x), y))) / \delta}.$$

Now let's move on to the proof of Lemma 2:

$$|(L(P) - L_S(P)) - (L(\hat{P}) - L_S(\hat{P}))| \quad (7)$$

$$= |\mathbb{E}_{\theta \sim P}(L(\theta) - L_S(\theta)) - \mathbb{E}_{\theta \sim \hat{P}}(L(\theta) - L_S(\theta))| \quad (8)$$

$$\leq |\mathbb{E}_{\theta \sim P|_{\Theta_K}} L(\theta) - \mathbb{E}_{\theta \sim \hat{P}|_{\Theta_K}} L(\theta)| + \max\{P(A^c), \hat{P}(A^c)\} \cdot \sup_{\theta \in \Theta_K} |L(\theta)| \quad (9)$$

$$\leq \rho \mathcal{W}^{(1)}(P|_{\Theta_K}, \hat{P}|_{\Theta_K}) + \max\{P(A^c), \hat{P}(A^c)\} \cdot \sup_{\theta \in \Theta_K} |L(\theta)| \quad (10)$$

$$\leq \frac{2C(\delta)\alpha^2 \tilde{C} K \Gamma}{3\lambda_{\min}(\mathbf{H}_S)\sqrt{n}} \text{tr}(\Sigma^{-1}) + \sup_{\theta \in \Theta} |L(\theta)| \cdot \frac{2p}{K\sqrt{2\pi}} e^{-K^2/2} \quad (11)$$

$$\triangleq C_1 \alpha^2 K + C_2 \frac{p}{K e^{K^2/2}}, \quad (12)$$

where  $C_1 \triangleq \frac{2C(\delta)\tilde{C}\Gamma}{3\lambda_{\min}(\mathbf{H}_S)\sqrt{n}} \text{tr}(\Sigma^{-1})$ ,  $C_2 \triangleq \sup_{\theta \in \Theta} |L(\theta)| \cdot \sqrt{\frac{2}{\pi}}$ . Let  $K \triangleq \sqrt{2 \log(\frac{C_2 p}{C_1 \alpha})}$ , we have

$$|(L(P) - L_S(P)) - (L(\hat{P}) - L_S(\hat{P}))| \leq C_1 \alpha^2 \left( \sqrt{2 \log(\frac{C_2 p}{C_1 \alpha})} + \sqrt{2 \log(\frac{C_2 p}{C_1 \alpha})}^{-1} \right).$$

□

### Proof of Lemma 3

*Proof.* Let  $\bar{P} = N(\theta^*, \Sigma)$ , by definition,

$$D_{\text{KL}}(\hat{P} \| \sigma(\mathcal{S})^\perp) \quad (13)$$

$$\leq D_{\text{KL}}(\hat{P} \| \bar{P}) \quad (14)$$

$$= \frac{1}{2} \int_{\theta \in \Theta} -\log \frac{|\Sigma_S|}{|\Sigma|} + (\theta - \theta_S^*)^\top (\Sigma^{-1} - \Sigma_S^{-1})(\theta - \theta_S^*) + 2(\theta - \theta_S^*)^\top \Sigma^{-1}(\theta_S^* - \theta^*) \quad (15)$$

$$+ (\theta_S^* - \theta^*)^\top \Sigma^{-1}(\theta_S^* - \theta^*) d\theta \quad (16)$$

$$= -\frac{1}{2} \log |\Sigma^{-1} \Sigma_S| + \frac{1}{2} \text{tr}(\Sigma^{-1} \Sigma_S - I) + \frac{1}{2} (\theta_S^* - \theta^*)^\top \Sigma^{-1}(\theta_S^* - \theta^*). \quad (17)$$

Let  $0 < a_* \leq a_1 \leq \dots \leq a_k \leq 1 \leq a_{k+1} \leq \dots \leq a_p$  be the eigenvalues of  $\mathbf{M}_S \triangleq \Sigma^{-1} \Sigma_S$ , thus

$$D_{\text{KL}}(\hat{P} \| \bar{P}) = \frac{1}{2} \sum_{i=1}^p (-\log a_i + a_i - 1) + \frac{1}{2} (\theta_S^* - \theta^*)^\top \Sigma^{-1}(\theta_S^* - \theta^*). \quad (18)$$

Since  $-\log(1 - x^{1/2}) + (1 - x^{1/2}) - 1$  is convex for  $x \in (0, (1 - a_*)^2)$  and  $-\log(1 + x^{1/2}) + (1 + x^{1/2}) - 1$  is concave for  $x > 0$ ,

$$\begin{aligned} -\log(1 - x^{1/2}) + (1 - x^{1/2}) - 1 &< \frac{-\log a_* + a_* - 1}{(1 - a_*)^2} x \\ -\log(1 + x^{1/2}) + (1 + x^{1/2}) - 1 &< \frac{1}{2(1 + \sqrt{x_0})} (x - x_0) + -\log(1 + \sqrt{x_0}) + (1 + \sqrt{x_0}) - 1. \end{aligned}$$

Where  $x_0 = \frac{V_2}{p-k}$ . Therefore,

$$\sum_{i=1}^k -\log a_i + a_i - 1 \leq \frac{-\log a_* + a_* - 1}{(1 - a_*)^2} V_1, \quad (19)$$

$$\sum_{i=k+1}^p -\log a_i + a_i - 1 \leq -(p-k) \log(1 + \sqrt{\frac{V_2}{p-k}}) + (p-k) \sqrt{\frac{V_2}{p-k}} \leq V_2, \quad (20)$$

where  $V_1 = \sum_{i=1}^k (a_i - 1)^2$ ,  $V_2 = \sum_{i=k+1}^p (a_i - 1)^2$ . Combine 19 and 20 we have

$$\mathbb{E}_{\mathcal{S}} D_{\text{KL}}(\hat{P} \parallel \sigma(\mathcal{S})^\perp) \leq \frac{1}{2} \max\left\{\frac{-\log a_* + a_* - 1}{1 - a_*}, 1\right\} M + \frac{1}{2} (\theta_{\mathcal{S}}^* - \theta^*)^\top \Sigma^{-1} (\theta_{\mathcal{S}}^* - \theta^*). \quad (21)$$

The final result follows the Chebyshev's inequality.  $\square$

### Proof of Proposition 3

*Proof.* (1): Since  $\mathbf{u}_t$  is uniformly bounded,  $\exists \mathbf{C} \in \mathbb{R}^{p \times p}$ ,  $\mathbf{C} \succ 0$  such that  $\text{Cov}(\mathbf{u}_t) \prec \mathbf{C}$  holds for any  $t$ . Then we have

$$\begin{aligned} \text{Cov}(\boldsymbol{\theta}_T) &= \sum_{t=0}^{T-1} \alpha^2 (\mathbf{I} - \alpha \mathbf{H}_{\mathcal{S}})^{T-t-1} \text{Cov}(\mathbf{u}_t) (\mathbf{I} - \alpha \mathbf{H}_{\mathcal{S}})^{T-t-1} \\ &\leq T \alpha^2 \mathbf{C} \\ &= \mathcal{O}(T \alpha^2). \end{aligned}$$

(2): Let  $\phi_x$  be the characteristic function of  $\mathbf{x}$ , thus

$$\begin{aligned} \phi_{\boldsymbol{\theta}_T - \mathbb{E}[\boldsymbol{\theta}_T]}(\mathbf{s}) &= \prod_{t=0}^{T-1} \phi_{\mathbf{u}_t}(\alpha (\mathbf{I} - \alpha \mathbf{H}_{\mathcal{S}})^t \mathbf{s}) \\ &= \prod_{t=0}^{T-1} (1 - \alpha^2 \mathbf{s}^\top (\mathbf{I} - \alpha \mathbf{H}_{\mathcal{S}})^t \text{Cov}(\mathbf{u}_t) (\mathbf{I} - \alpha \mathbf{H}_{\mathcal{S}})^t \mathbf{s} + o(\alpha^2 \|\mathbf{s}\|_2^2)) \\ &= 1 - \mathbf{s}^\top \text{Cov}(\boldsymbol{\theta}_T) \mathbf{s} + o(\|\mathbf{s}\|_2^2 \alpha^2), \end{aligned}$$

By the proof of (1),  $\phi_{\boldsymbol{\theta}_\infty}(\mathbf{s}) \rightarrow 1 - \mathbf{s}^\top \text{Cov}(\boldsymbol{\theta}_\infty) \mathbf{s}$  as  $\max \alpha_t \rightarrow 0$ , thus  $(\sum_{t=0}^{T-1} \alpha_t^2)^{-1/2} (P(\alpha) - \hat{P}(\alpha)) \xrightarrow{\text{law}} \mathbf{0}$ .

(3): Without loss of generality, assume that the eigenvector direction of  $\mathbf{H}_{\mathcal{S}}$  is consistent with the coordinate axis. Let event  $A = \{\boldsymbol{\theta} \mid |\boldsymbol{\theta}[i] - \boldsymbol{\theta}_{\mathcal{S}}^*[i]| \leq K \sqrt{\boldsymbol{\Sigma}[i][i]}, i = 1, \dots, p\}$ .

$$\mathcal{W}^{(1)}(P|_{\Theta_K}, \hat{P}|_{\Theta_K}) = \inf_{F_{\boldsymbol{\theta}_1} = F_{P|_{\Theta_K}}, F_{\boldsymbol{\theta}_2} = F_{\hat{P}|_{\Theta_K}}} \mathbb{E}_{\boldsymbol{\theta}_1, \boldsymbol{\theta}_2} \|\boldsymbol{\theta}_1 - \boldsymbol{\theta}_2\|_1 \quad (22)$$

$$\leq \inf_{F_{\theta_1}=F_P, F_{\theta_2}=F_{\hat{P}}} \mathbb{E}_{\theta_1, \theta_2} [\|\theta_1 - \theta_2\|_1 \cdot \chi_A(\theta_1) \cdot \chi_A(\theta_2)] \quad (23)$$

$$\leq \inf_{F_{\theta_1}=F_P, F_{\theta_2}=F_{\hat{P}}} \sum_{i=1}^p \int_{\theta_S^*[i]-K\sqrt{\Sigma[i][i]}}^{\theta_S^*[i]+K\sqrt{\Sigma[i][i]}} |F_{P_i}(x) - F_{\hat{P}_i}(x)| dx \quad (24)$$

$$\leq 2K \sum_{i=1}^p \sqrt{\Sigma[i][i]} \cdot \tilde{C} \mathbb{E} |\theta[i] / \sqrt{\Sigma[i][i]}|^3 \quad (25)$$

$$\leq 2\tilde{C}K \left( \sum_{i=1}^q (\Sigma[i][i])^{-1} \cdot \left( \sum_{t=0}^{T-1} \alpha^3 (1 - \alpha \tilde{\lambda}_{\min}(\mathbf{H}_S))^{3t} \Gamma \right) [i] \right. \quad (26)$$

$$\left. + \sum_{i=q+1}^p (\Sigma[i][i])^{-1} \cdot \left( \sum_{t=0}^{T-1} \alpha^3 \mathbb{E} |\mathbf{u}_t[i]|^3 \right) \right) \quad (27)$$

$$\leq \tilde{C}' K \left( \frac{\alpha \Gamma}{3\tilde{\lambda}_{\min}} + \frac{\sum_{i=1}^T \alpha_i^3}{\sum_{i=1}^T \alpha_i^2} \right), \quad (28)$$

where (26) is obtained by Berry-Essen inequality.  $\square$

## Proof of Lemma 4

*Proof.*

$$|(L(P) - L_S(P)) - (L(\hat{P}) - L_S(\hat{P}))| \quad (29)$$

$$= |\mathbb{E}_{\theta \sim P} L(\theta) - \mathbb{E}_{\theta \sim \hat{P}} L(\theta)| \quad (30)$$

$$\leq |\mathbb{E}_{\theta \sim P|\Theta_K} L(\theta) - \mathbb{E}_{\theta \sim \hat{P}|\Theta_K} L(\theta)| + \max\{P(A^c), \hat{P}(A^c)\} \cdot \sup_{\theta \in \Theta_K} |L(\theta)| \quad (31)$$

$$\leq \frac{C(\delta)}{\sqrt{n}} \mathcal{W}^{(1)}(P|\Theta_K, \hat{P}|\Theta_K) + \max\{P(A^c), \hat{P}(A^c)\} \cdot \sup_{\theta \in \Theta_K} |L(\theta)| \quad (32)$$

$$\leq \frac{2C(\delta)\tilde{C}K \left( \frac{\alpha \Gamma}{3\tilde{\lambda}_{\min}} + \frac{\sum_{i=1}^T \alpha_i^3}{\sum_{i=1}^T \alpha_i^2} \right)}{\sqrt{n}} + \sup_{\theta \in \Theta} |L(\theta)| \cdot \frac{2p}{K\sqrt{2\pi}} e^{-K^2/2} \quad (33)$$

$$\triangleq C_1 K + C_2 \frac{p}{K e^{K^2/2}}, \quad (34)$$

where  $C_1 \triangleq \frac{2C(\delta)\tilde{C}K \left( \frac{\alpha \Gamma}{3\tilde{\lambda}_{\min}} + \frac{\sum_{i=1}^T \alpha_i^3}{\sum_{i=1}^T \alpha_i^2} \right)}{\sqrt{n}}$ ,  $C_2 \triangleq \sup_{\theta \in \Theta} |L(\theta)| \cdot \sqrt{\frac{2}{\pi}}$ . Let  $K \triangleq \sqrt{2 \log(\frac{C_2 p}{C_1})}$ , we have

$$|(L(P) - L_S(P)) - (L(\hat{P}) - L_S(\hat{P}))| \leq C_1 \left( \sqrt{2 \log(\frac{C_2 p}{C_1})} + \sqrt{2 \log(\frac{C_2 p}{C_1})}^{-1} \right).$$

$\square$

## Proof of Proposition 5

- (1) Additive Noise Insertion: By substituting  $\mathbf{u}_t$  in the proof of Proposition 1 with  $\mathbf{u} - \boldsymbol{\eta}_t$ , then our conclusion directly follows  $\text{Cov}(\mathbf{u} - \boldsymbol{\eta}_t) = \text{Cov}(\mathbf{u}) + \text{Var}(\boldsymbol{\eta}_0[1])\mathbf{I}$ .
- (2) Multiplicative Noise Insertion: The dynamic of SGD with multiplicative noise is:

$$\begin{aligned}\boldsymbol{\theta}_{t+1} &= \boldsymbol{\theta}_t - \alpha \boldsymbol{\gamma}^{(t)} \odot g_{B_t} = (\mathbf{I} - \alpha \mathbf{H}_S \odot \boldsymbol{\gamma}^{(t)}) \boldsymbol{\theta}_t - \alpha \boldsymbol{\gamma}^{(t)} \odot \mathbf{u}_t \\ \Rightarrow \\ \boldsymbol{\theta}_T &= \sum_{t=0}^{T-1} \prod_{i=t+1}^{T-1} (\mathbf{I} - \alpha \mathbf{H}_S \odot \boldsymbol{\gamma}^{(i)}) \cdot \alpha \boldsymbol{\gamma}^{(t)} \odot \mathbf{u}_t + \prod_{t=1}^T (\mathbf{I} - \alpha \mathbf{H}_S \odot \boldsymbol{\gamma}^{(t)}) \boldsymbol{\theta}_0.\end{aligned}$$

By taking the covariance of  $\boldsymbol{\theta}_T$ , we have

$$\begin{aligned}\text{Cov}(\boldsymbol{\theta}_T) &= \mathbb{E}_{\boldsymbol{\gamma}_T, \mathbf{u}}[(\mathbf{I} - \alpha \mathbf{H}_S \odot \boldsymbol{\gamma}^{(T)}) \text{Cov}(\boldsymbol{\theta}_{T-1}) (\mathbf{I} - \alpha \mathbf{H}_S \odot \boldsymbol{\gamma}^{(T)})] + \text{Cov}(\alpha \boldsymbol{\gamma}_T \odot \mathbf{u}_t) \\ &= (\mathbf{I} - \alpha \mathbf{H}_S) \text{Cov}(\boldsymbol{\theta}_{T-1}) (\mathbf{I} - \alpha \mathbf{H}_S) + \text{Cov}(\alpha \boldsymbol{\gamma}_T \odot \mathbf{u}_t) + \mathcal{O}(\alpha^2 \text{Cov}(\boldsymbol{\theta}_{T-1})) \\ \Rightarrow \\ \lim_{\alpha \rightarrow 0} \alpha^{-1} \text{Cov}(\boldsymbol{\theta}_T) &= \lim_{\alpha \rightarrow 0} \alpha^{-1} (\mathbf{I} - \alpha \mathbf{H}_S) \text{Cov}(\boldsymbol{\theta}_{T-1}) (\mathbf{I} - \alpha \mathbf{H}_S) + \alpha^{-1} \text{Cov}(\alpha \boldsymbol{\gamma}_T \odot \mathbf{u}_t) \\ &= \lim_{\alpha \rightarrow 0} \alpha \sum_{t=0}^T (\mathbf{I} - \alpha \mathbf{H}_S)^t \mathbf{C}' (\mathbf{I} - \alpha \mathbf{H}_S)^t,\end{aligned}$$

where  $\mathbf{C}' = (\mathbf{C} + (\mathbb{E} \boldsymbol{\gamma}_0[1]^2 - 1) \text{diag}(\mathbf{C}))$ . By taking  $T = \infty$ , we have

$$\lim_{\alpha \rightarrow 0} \alpha^{-1} \text{Cov}(\boldsymbol{\theta}'_\infty) = \alpha \sum_{t \geq 0} (\mathbf{I} - \alpha \mathbf{H}_S)^t \mathbf{C}' (\mathbf{I} - \alpha \mathbf{H}_S)^t.$$

## Appendix B. Detailed Experiments

### Experimental Settings

Our experiments on neural networks are conducted on different models and different datasets, namely MNIST [1] and CIFAR-10 [2]. On MNIST dataset, we train a three-layer network (model 1) with  $(784 \times 200 \text{ FC})$ -ReLU- $(200 \times 200 \text{ FC})$ -ReLU- $(200 \times 10 \text{ FC})$ , where FC denotes a fully connected layer. We use the optimizer of SGD with batch\_size=200 and learning\_rate= 0.01 for the network. For CIFAR-10 dataset, we use a convolution network (model 2) with  $(3 \times 6 \ 5 \times 5 \text{ C})$ -ReLU-MP2- $(6 \times 16 \ 5 \times 5 \text{ C})$ -ReLU-MP2- $(400 \times 120 \text{ FC})$ -ReLU- $(120 \times 84 \text{ FC})$ -ReLU- $(84 \times 10 \text{ FC})$ , where  $(5 \times 5 \text{ C})$  denotes a  $5 \times 5$  convolution layer and MP2 denotes a  $2 \times 2$  max pooling layer. The optimizer of SGD is used again but the settings changes to batch\_size= 4 and learning\_rate= 0.001. Experiments are executed as follows:

1. Initialize the model at a fixed point in the vicinity of the optima. In each experiments, we get this fixed point by training 5 epochs on model 1 and 10 epochs in model 2 with a Xavier and Kaiming initialization [3].

2. Train the models until the training loss and accuracy are stable. we train 30 epochs on model 1 and 50 epochs on model 2.
3. Repeat the second step for 3000 times and collect the parameters of the final epochs. We obtain  $\{\theta_{\text{MNIST}}^{(i)}\}_{i=1}^{3000}, \{\theta_{\text{CIFAR10}}^{(i)}\}_{i=1}^{3000}$ .
4. Take MNIST for example, for each marginal  $j = 1, \dots, p_{\text{MNIST}}$  with  $p_{\text{MNIST}} = 198800$ , we perform the Person test on  $\{\theta_{\text{MNIST}}^{(i)}[j]\}_{i=1}^{3000}$  to check where marginal-Gaussianity holds for the  $j_{\text{th}}$  dimension. This results to 198800 marginal p-values. At a confidential level of  $1 - \delta$ , we reject the null hypothesis that the  $j_{\text{th}}$  marginal is Gaussian if the corresponding p-value is smaller than  $\delta$ . The same procedures are conducted on CIFAR-10.
5. Take MNIST for example, we calculate the percentage of the marginals with p-values smaller than a given threshold, which takes values in  $\{0.001, 0.002, \dots, 0.999, 1\}$ . Then we obtain the percentage v.s. p-values thresholds plot, which show us how the marginal Gaussianity is violated at different confidential level.

All these procedures are repeated 5 times.

## Experimental Results

### Experiments on Two-Dimensional Loss functions

The scatter plots (see Figure 1 and Figure 2) of the limiting parameter distributions again coincide with our understanding: the limiting parameter distribution of SGD with non-Gaussian gradient noise tends to be Gaussian-like. To further examine the two-dimensional Gaussianity of the limiting distribution, the aforementioned procedures with a random initialization  $\{\theta_0[1], \theta_0[2]\} \stackrel{\text{i.i.d}}{\sim} \text{U}(0, 1)$  are repeated 30 times. For each initialization, we perform the Henze-Zirkler multivariate normality test on the limiting distributions. We then collect the p-values of each repetition. As we can see in Figure 3, Figure 4 and Figure 5, there is no statistically significant evidence against the null hypothesis that the limiting distribution is Gaussian.

### Experiments on Neural Networks

For a given threshold (horizontal-axis), we calculate the percentage (vertical-axis) of marginals with p-values smaller than the threshold. The horizontal-axis of the lower figure is log-scaled. Table 1 shows that the marginal-Gaussianity holds for most of the dimensions and strongly suggests that the limited distributions of parameters are Gaussian-like.

## References

- [1] LeCun, Y., Cortes, C.: MNIST handwritten digit database (2010)
- [2] Krizhevsky, A., Hinton, G.: Learning multiple layers of features from tiny images. Master’s thesis, Department of Computer Science, University of Toronto (2009)

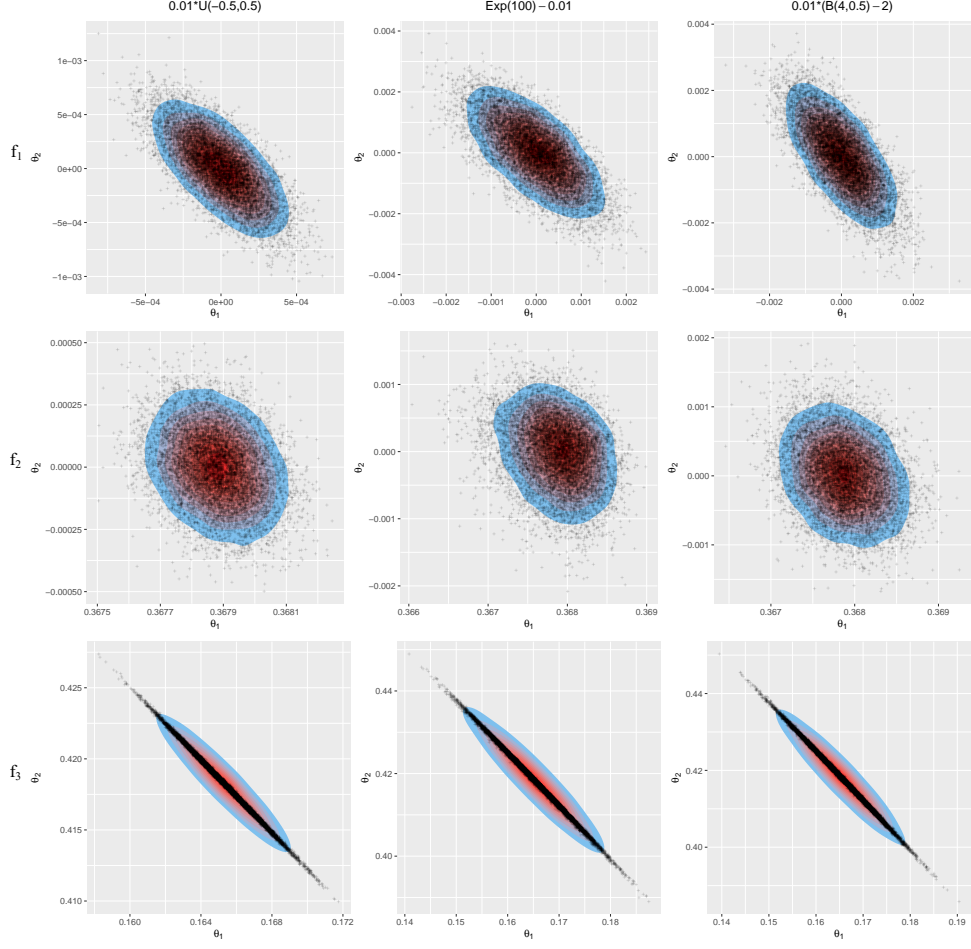

**Fig. 1** For each gradient noise implements (including adding uniform, exponential and binomial gradient noise) and each loss functions  $f_1, f_2$  and  $f_3$ , experiments are ran with  $\alpha = 0.01$  and  $\theta_0 = (1, 1)^\top$ . We visualize the empirical limiting distribution by a 2D-kernel density plot.

- [3] He, K., Zhang, X., Ren, S., Sun, J.: Delving Deep into Rectifiers: Surpassing Human-Level Performance on ImageNet Classification (2015)



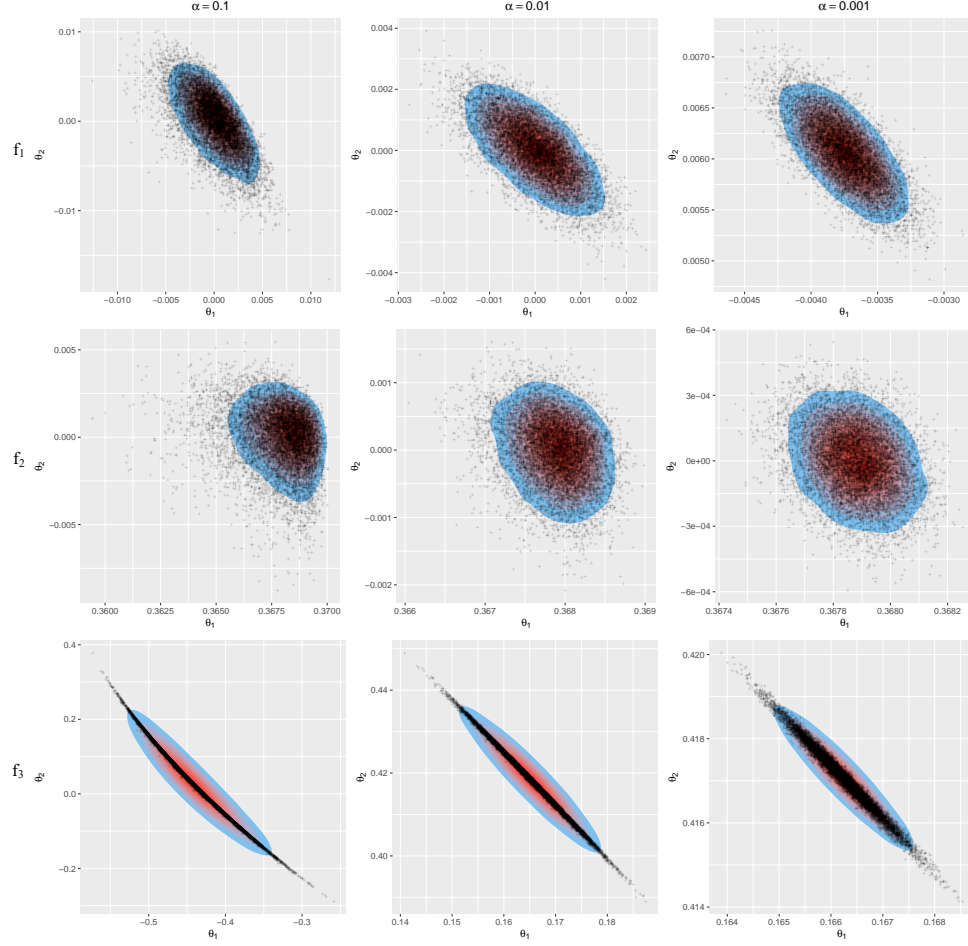

**Fig. 2** The gradient noise is fixed to be exponential. For each loss functions  $f_1, f_2, f_3$ , the experiments are ran with  $\alpha \in \{0.1, 0.01, 0.001\}$  and a fixed initialization  $\theta_0 = (1, 1)^T$ . We visualize the empirical limiting distribution by a 2D-kernel density plot.

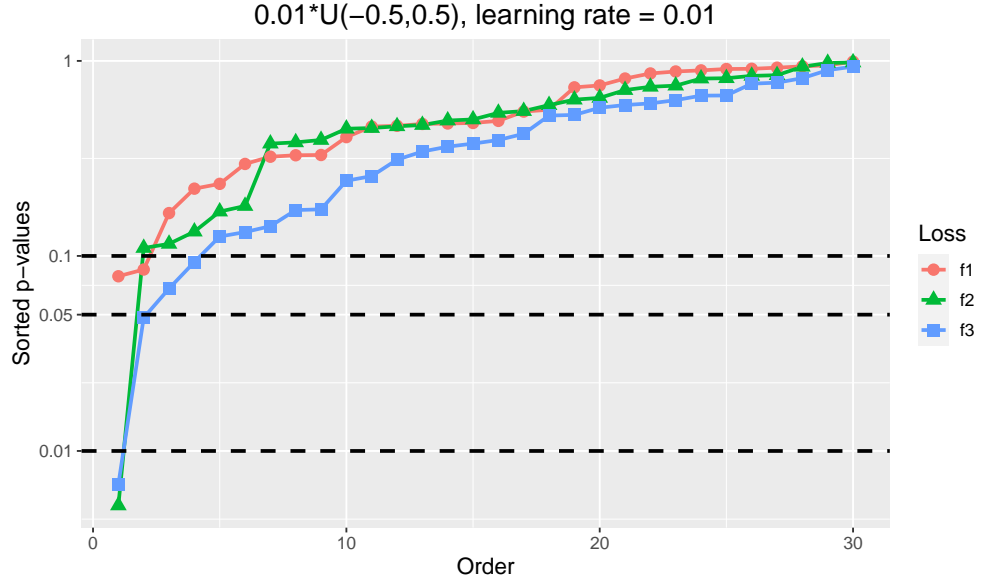

**Fig. 3** For loss functions  $f_1, f_2, f_3$ , we perform SGD with uniformly distributed gradient noise and  $\alpha = 0.01$ . At the confidential level of 0.99, about 29/30 of the 30 repetitions fail to provide statistically significant evidence against the two-dimensional Gaussianity of the limiting parameter distributions.

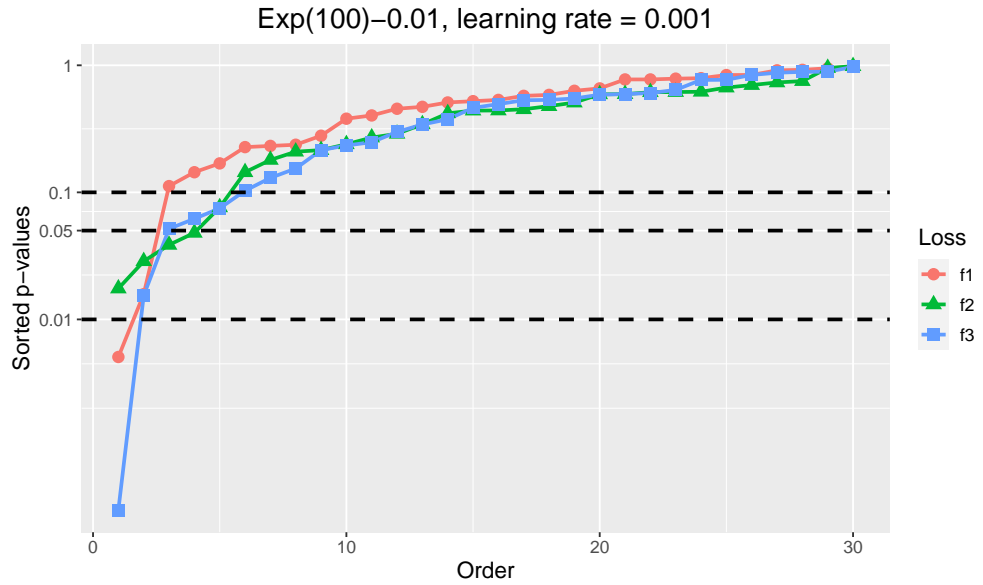

**Fig. 4** For loss functions  $f_1, f_2, f_3$ , we perform SGD with exponentially distributed gradient noise and  $\alpha = 0.001$ . At the confidential level of 0.99, about 29/30 of the 30 repetitions fail to provide statistically significant evidence against the two-dimensional Gaussianity of the limiting parameter distributions.

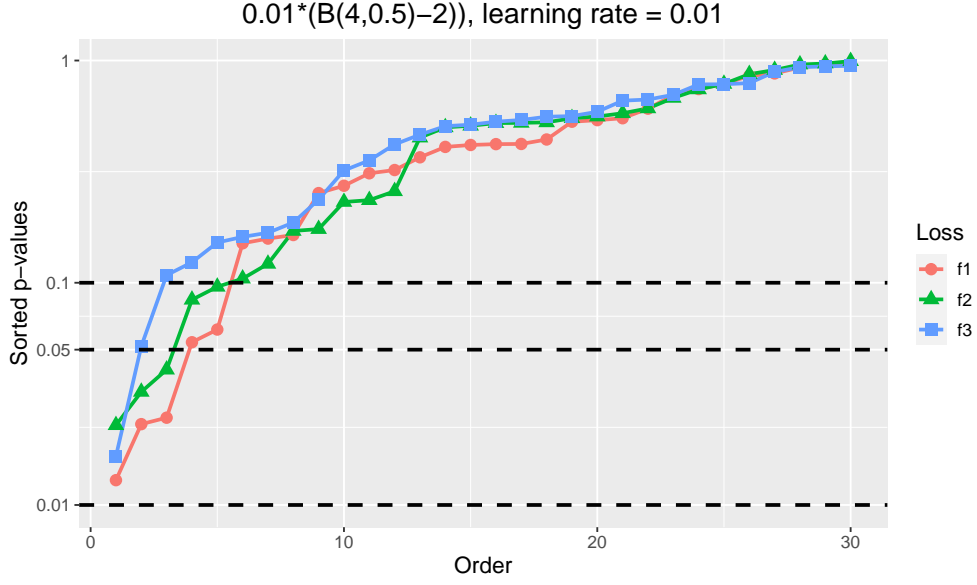

**Fig. 5** For loss functions  $f_1, f_2, f_3$ , we perform SGDs with binomially distributed gradient noise and  $\alpha = 0.01$ . At the confidential level of 0.99, all of the 30 repetitions fail to provide statistically significant evidence against the two-dimensional Gaussianity of the limiting parameter distributions.

**Table 1** For each experiment, we calculate the percentages of dimensions with marginal p-values smaller than 0.1, 0.05 and 0.01, respectively. For a marginal with a p-value smaller than  $\delta \in (0, 1)$ , we can reject the null hypothesis that this marginal follows a Gaussian distribution at a confidential level of  $1 - \delta$ . As we can see, at the confidential level of 0.99, marginal Gaussianity holds for most of the marginals.

| Percentage      | $\leq 0.1$ | $\leq 0.05$ | $\leq 0.01$ |
|-----------------|------------|-------------|-------------|
| MNIST Exp. 1    | 10.8%      | 5.7%        | 1.5%        |
| MNIST Exp. 2    | 11.8%      | 6.9%        | 2.6%        |
| MNIST Exp. 3    | 12.3%      | 7.2%        | 2.7%        |
| MNIST Exp. 4    | 12.6%      | 7.5%        | 3.2%        |
| MNIST Exp. 5    | 12.2%      | 7.0%        | 2.6%        |
| CIFAR-10 Exp. 1 | 10.8%      | 5.7%        | 1.5%        |
| CIFAR-10 Exp. 2 | 11.8%      | 6.9%        | 2.6%        |
| CIFAR-10 Exp. 3 | 12.4%      | 7.2%        | 2.7%        |
| CIFAR-10 Exp. 4 | 12.6%      | 7.5%        | 3.2%        |
| CIFAR-10 Exp. 5 | 12.2%      | 7.0%        | 2.6%        |

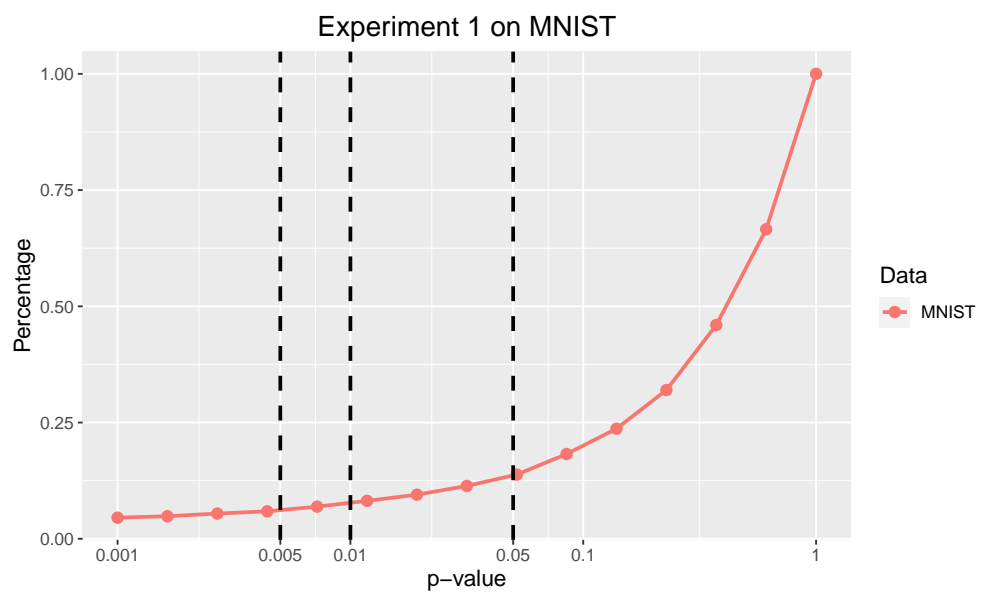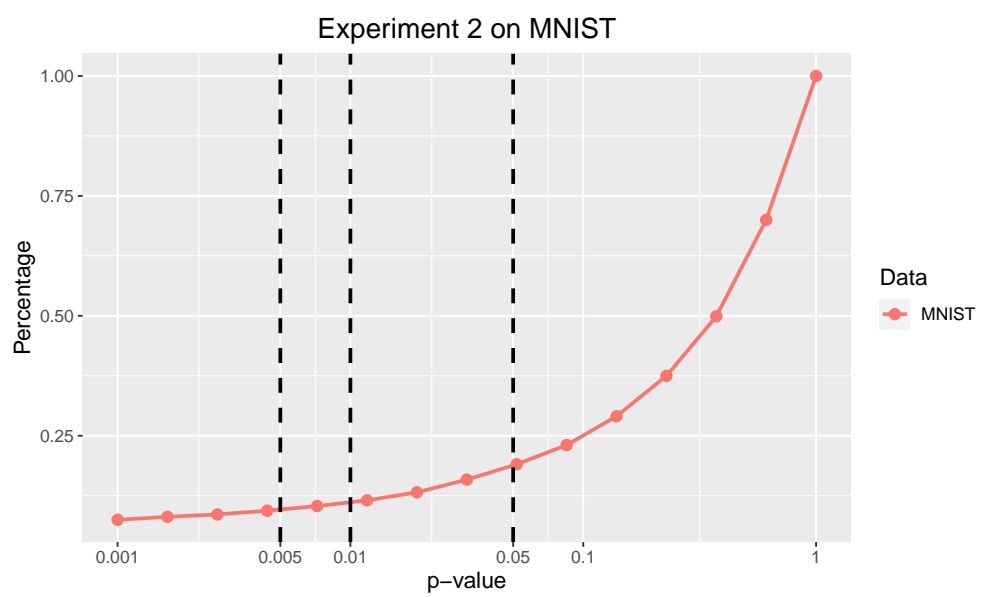

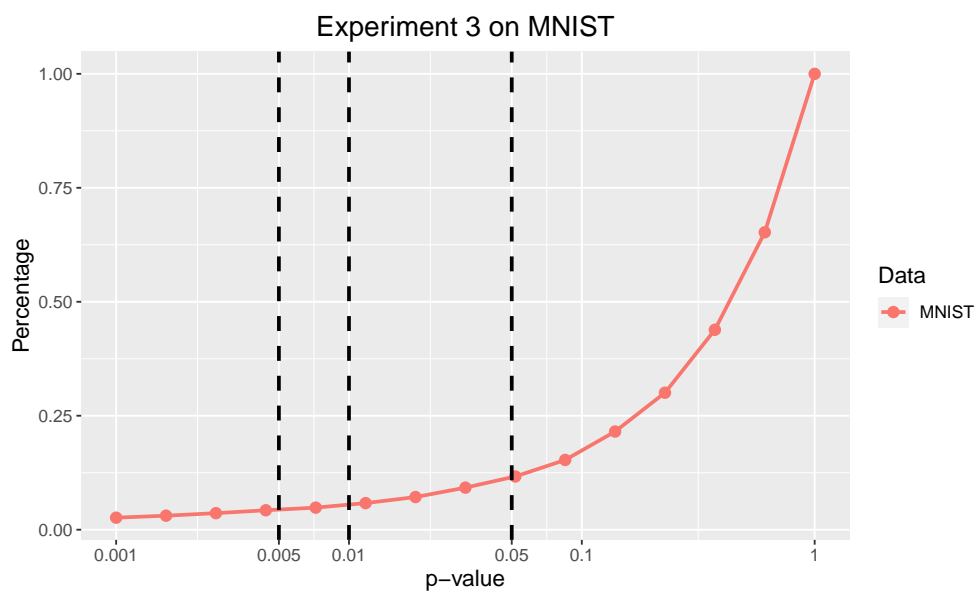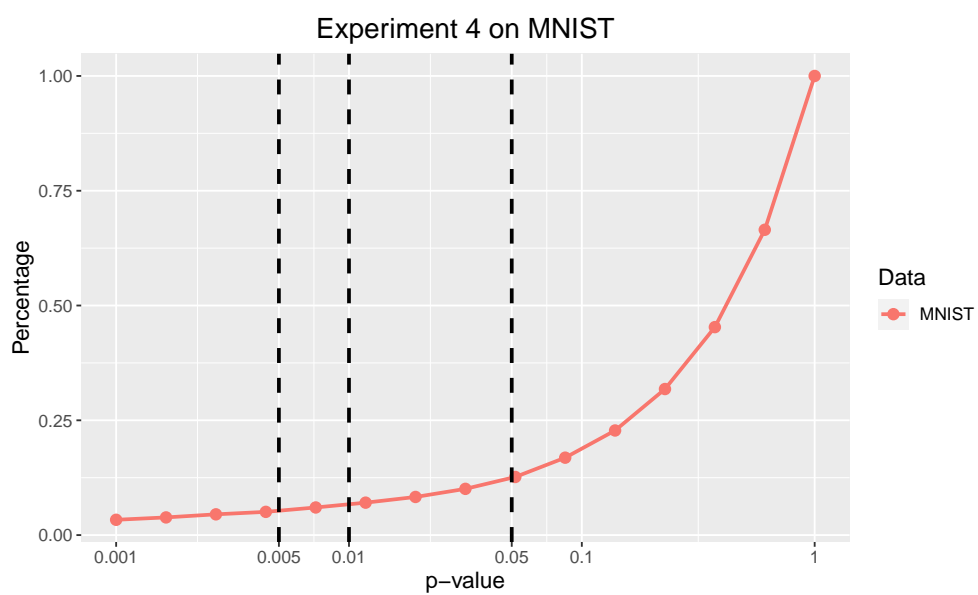

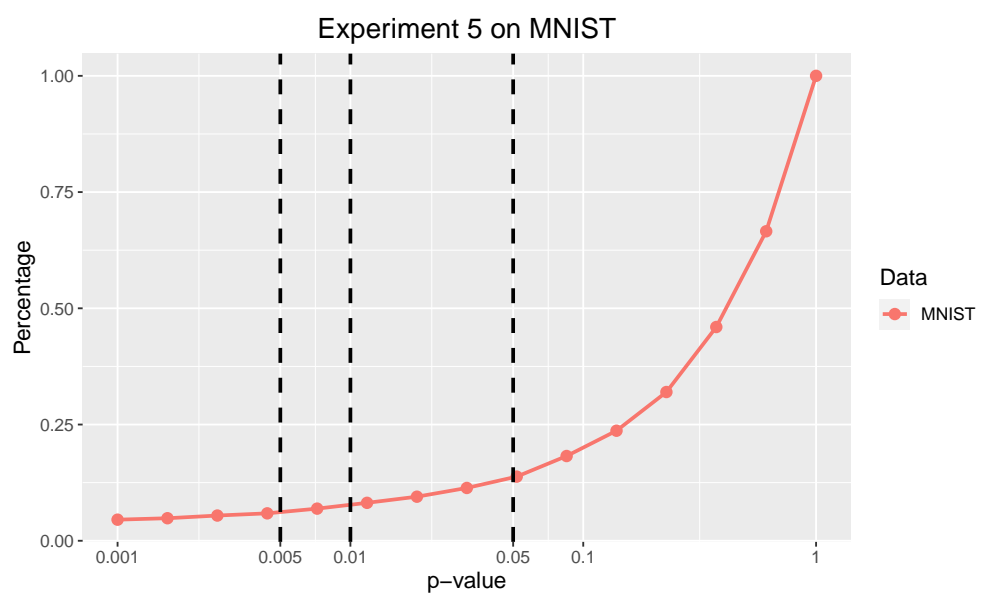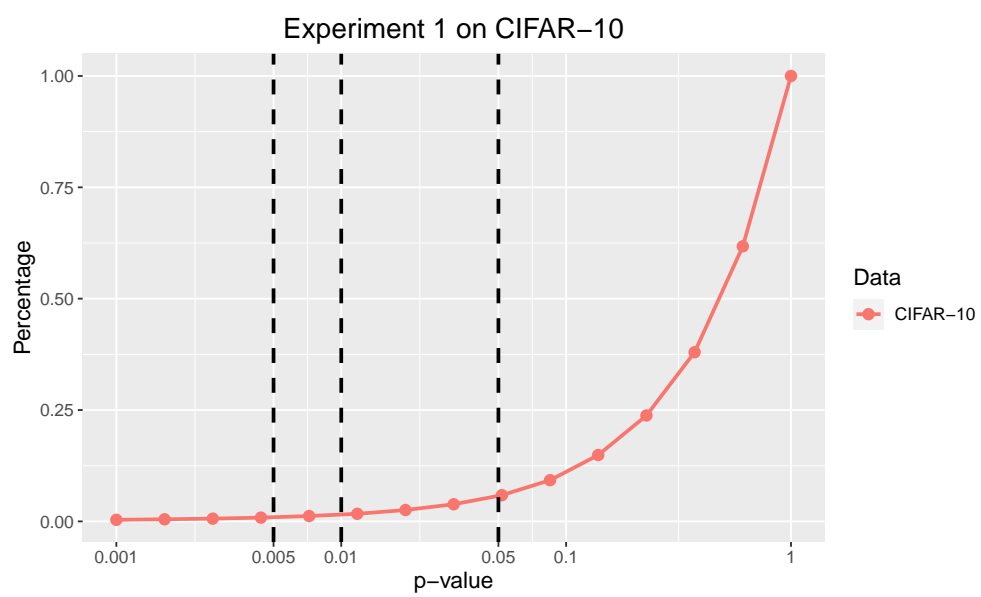

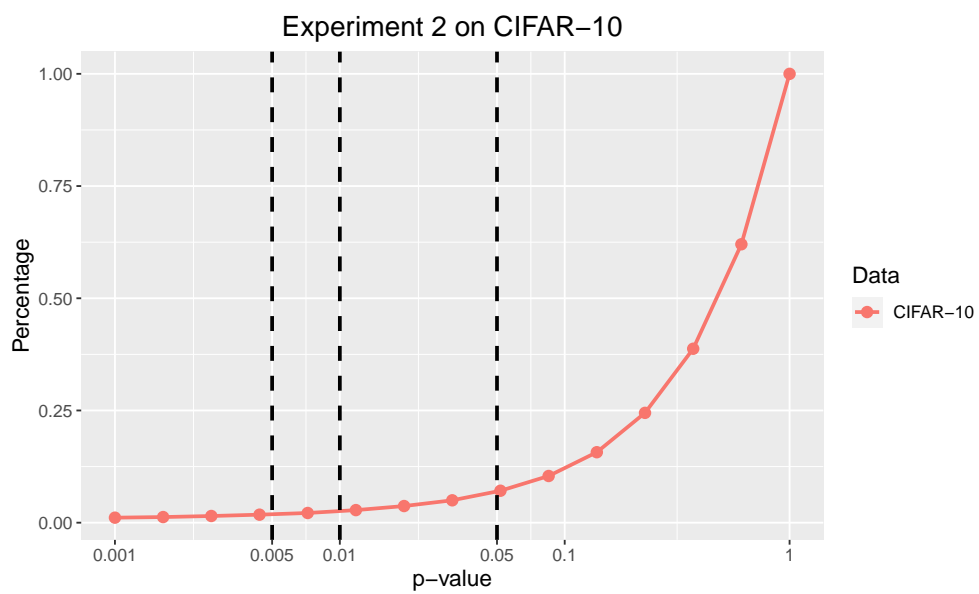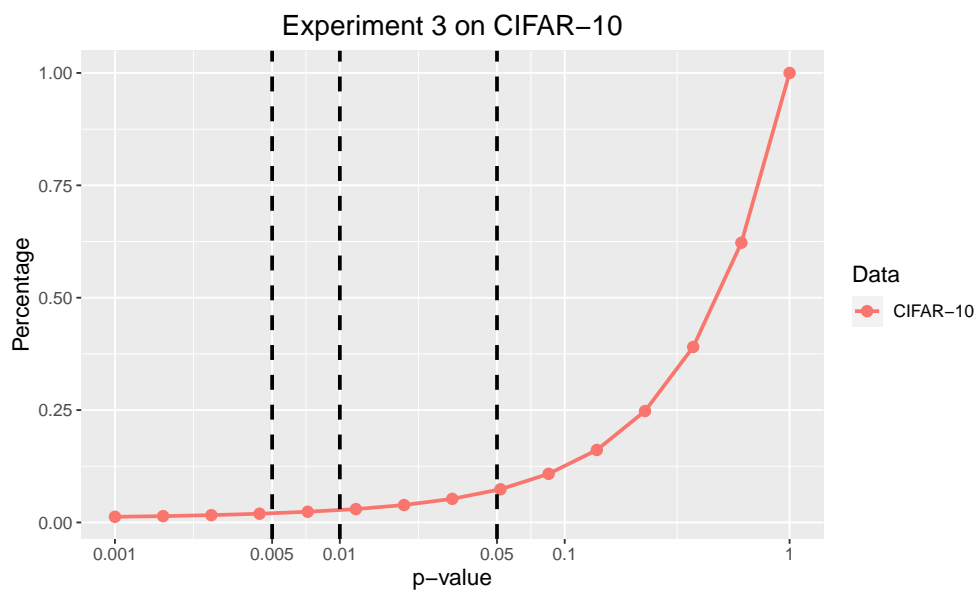

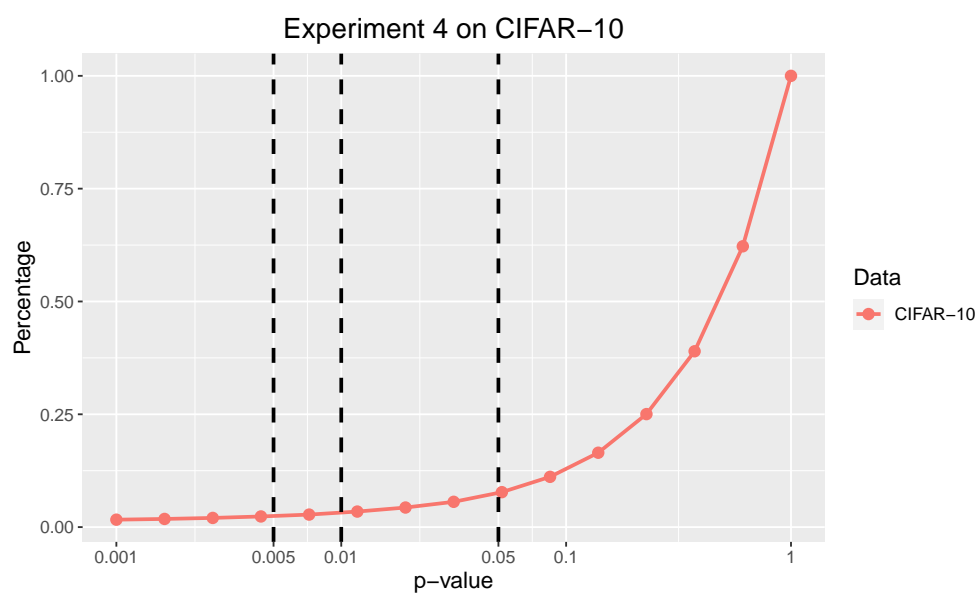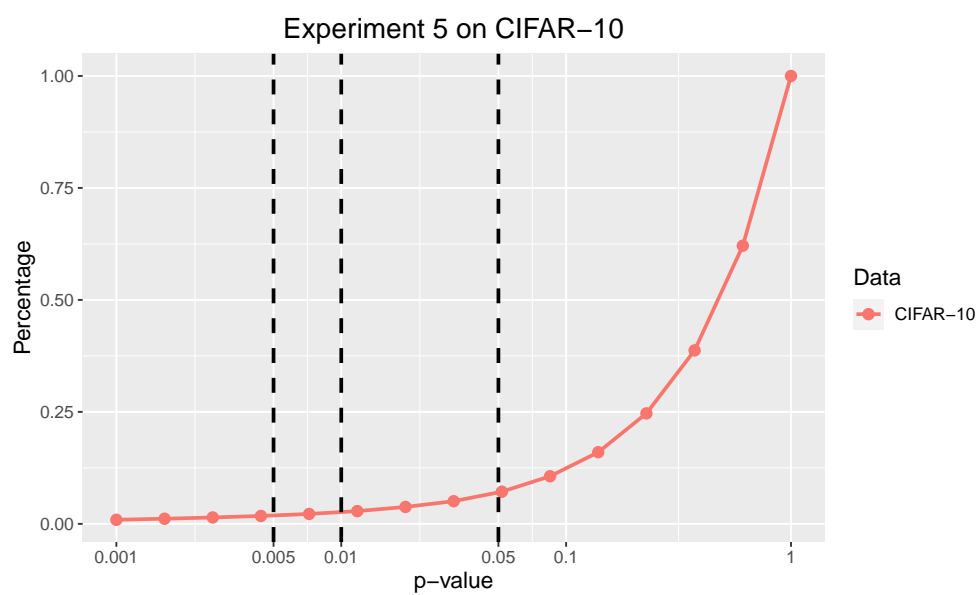

Supplement: Supplementary file 1 [file e9784e2820bfa55aa4984404.pdf]
